# Supplementary material for: Influence of Beam Angle on Normal Tissue Complication Probability of Knowledge-Based Head and Neck Cancer Proton Planning
Source: MDPI journal article supplement (doi:10.3390/cancers14122849), 2022-06-09
Supplement: s1 [file s1]

### Supplementary Material S1: NTCP Equation and Coefficients

Normal tissue complication probability (NTCP) was calculated as  $NTCP = \frac{1}{1+e^{-S}}$ , where  $S = \beta_0 + \sum_i(\beta_i \cdot x_i)$  [26]. The coefficients  $\beta$  for each dose value  $x$  are presented in Table A1 below. The primary tumor location for all patients was assumed to be in pharynx.

Table S1: Variable coefficients used to estimate the NTCP values [26].

| VARIABLES                                                                 | ENDPOINTS                 |                |                          |                |
|---------------------------------------------------------------------------|---------------------------|----------------|--------------------------|----------------|
|                                                                           | Xerostomia after 6 months |                | Dysphagia after 6 months |                |
|                                                                           | Grade $\geq 2$            | Grade $\geq 3$ | Grade $\geq 2$           | Grade $\geq 3$ |
| Constant ( $\beta_0$ )                                                    | -2.2951                   | -3.7286        | -4.0536                  | -7.6174        |
| $\sqrt{D_{\text{mean}}(I. Parotid)} + \sqrt{D_{\text{mean}}(C. Parotid)}$ | 0.0996                    | 0.0855         |                          |                |
| $D_{\text{mean}}(Both Submandibulars)$                                    | 0.0182                    | 0.0156         |                          |                |
| $D_{\text{mean}}(Oral Cavity)$                                            |                           |                | 0.0300                   | 0.0259         |
| $D_{\text{mean}}(PCM Sup)$                                                |                           |                | 0.0236                   | 0.0203         |
| $D_{\text{mean}}(PCM Med)$                                                |                           |                | 0.0095                   | 0.0303         |
| $D_{\text{mean}}(PCM Inf)$                                                |                           |                | 0.0133                   | 0.0341         |
| Primary Tumor Location in Pharynx                                         |                           |                | -0.6281                  | 0.0387         |
