# Supplementary material for: Influence of Beam Angle on Normal Tissue Complication Probability of Knowledge-Based Head and Neck Cancer Proton Planning
Source: MDPI journal article supplement (doi:10.3390/cancers14122849), 2022-06-09

#### Supplementary Material S4: Results for multiple fields

Figure S3: NTCP<sub>Σ</sub> and HI over 3/4/5 fields for 3 patients before and after AIO processing.

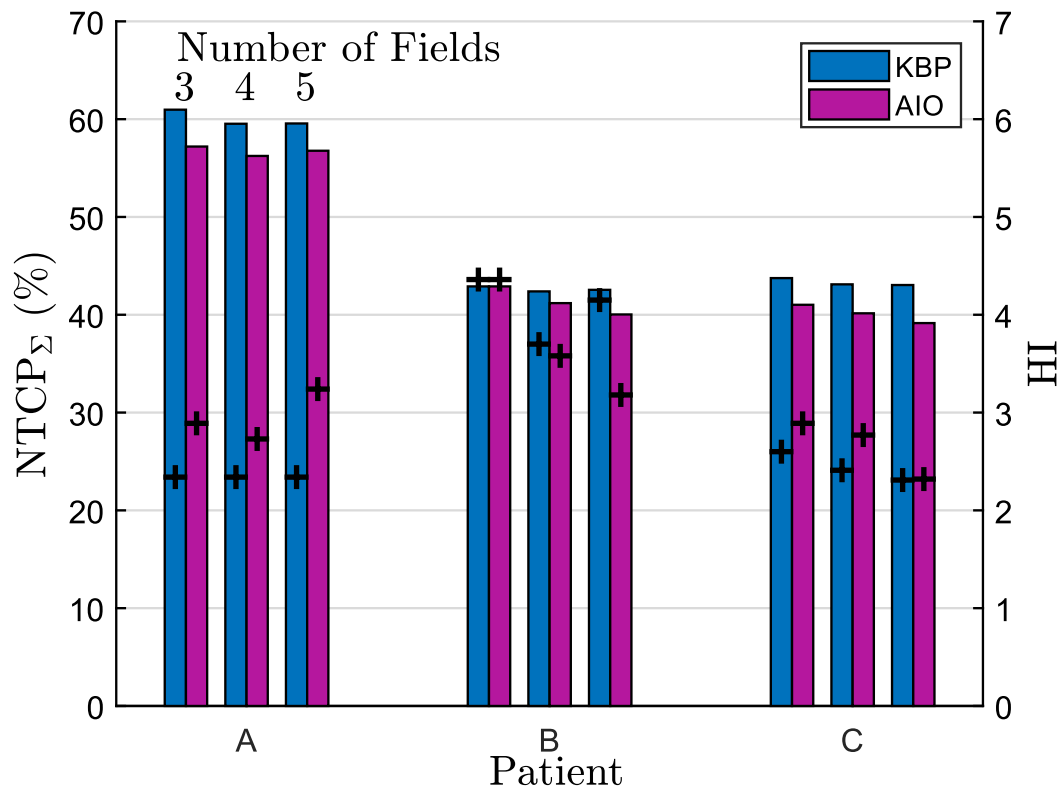

Supplement: s1 [file s1]
