# Supplementary material for: Influence of Beam Angle on Normal Tissue Complication Probability of Knowledge-Based Head and Neck Cancer Proton Planning
Source: MDPI journal article supplement (doi:10.3390/cancers14122849), 2022-06-09

### Supplementary Material S3: Delineations of two patients

Figure S2: Delineations of patients 6 and 5. PCM Inf/Med/Sup = inferior/middle/superior pharyngeal constrictor muscle; Parotid L/R = left/right parotid gland; Subm L/R = left/right submandibular gland.

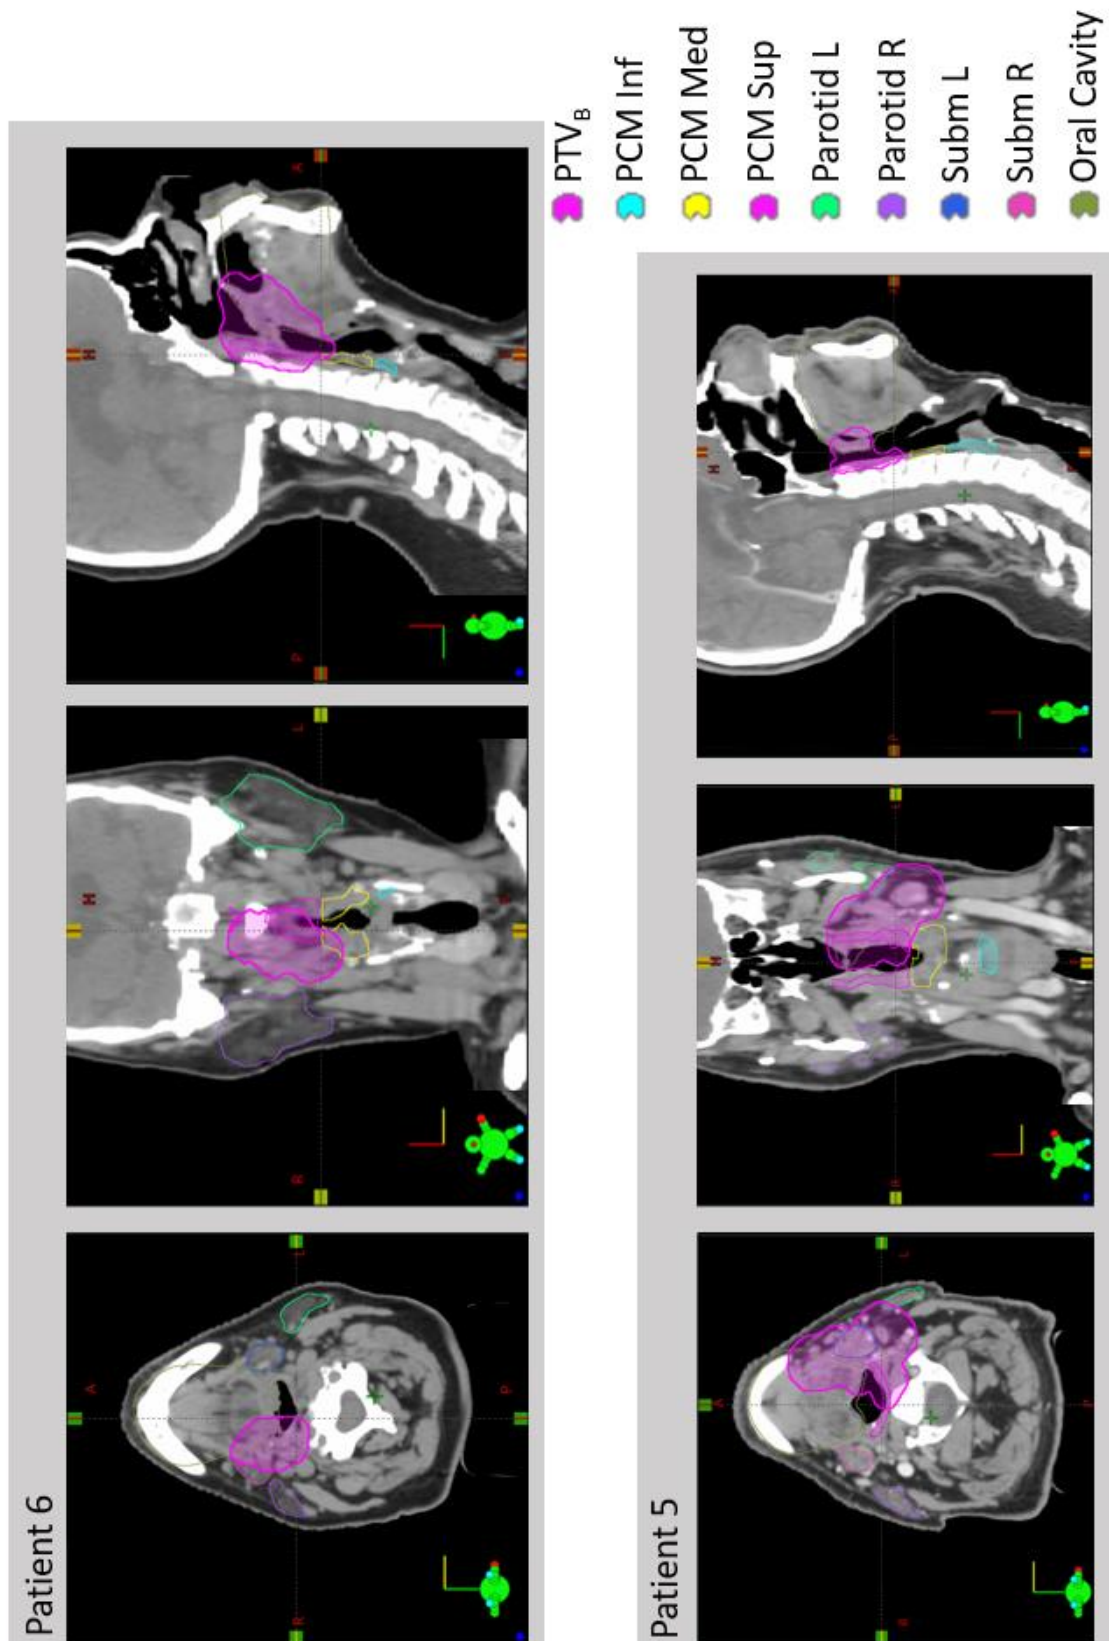

Supplement: s1 [file s1]
