# Supplementary material for: Influence of Beam Angle on Normal Tissue Complication Probability of Knowledge-Based Head and Neck Cancer Proton Planning
Source: Cancers (Basel). 2022 Jun 9;14(12):2849. doi: 10.3390/cancers14122849 (PMC9221467; doi:10.3390/cancers14122849)
Supplement: Supplementary file 1 [file cancers-14-02849-s001.zip]

Archive with 4 entries (4 files):
- Supplementary_Material_S1.pdf
- Supplementary_Material_S2.pdf
- Supplementary_Material_S3.pdf
- Supplementary_Material_S4.pdf
